# Supplementary material for: Oncogenic Impact of TONSL, a Homologous Recombination Repair Protein at the Replication Fork, in Cancer Stem Cells
Source: Int J Mol Sci. 2023 May 31;24(11):9530. doi: 10.3390/ijms24119530 (PMC10253825; doi:10.3390/ijms24119530)
Supplement: Supplementary file 1 [file ijms-24-09530-s001.zip › ijms-2321182-supplementary.pdf]

## Supplementary Figure S1

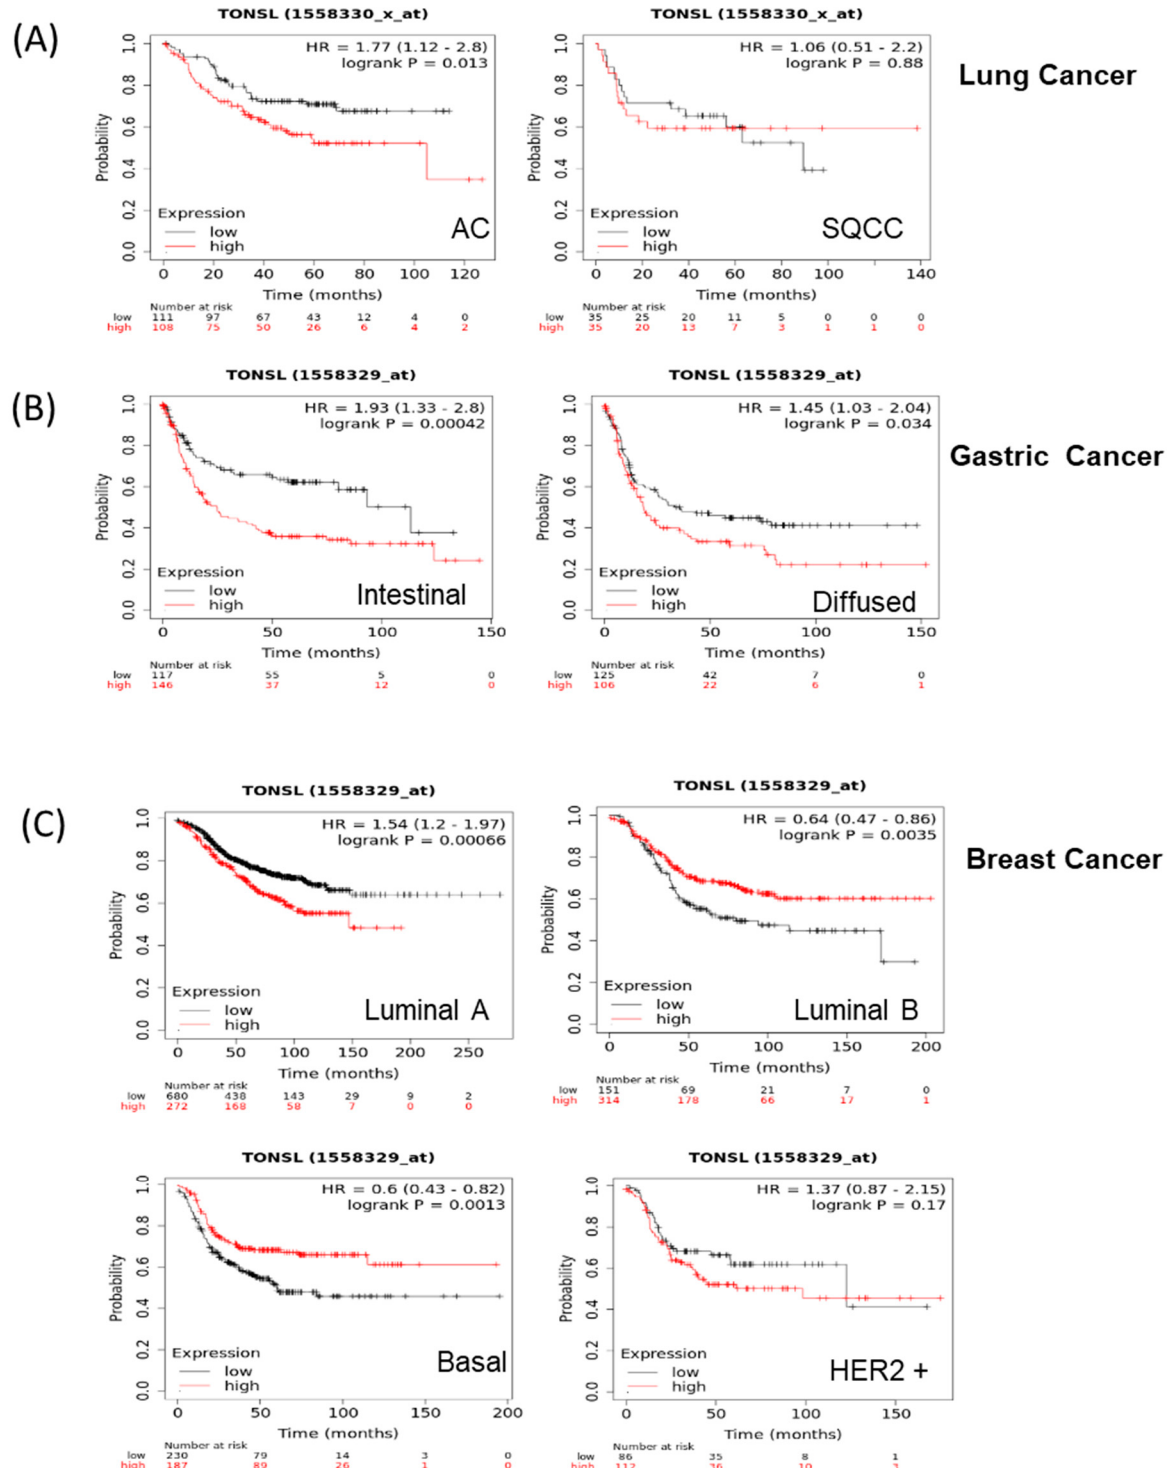

**Figure S1.** TONSL mRNA expression (from gene chip) was associated with cancer prognosis, recurrence free survivals. Kaplan-Meier survival curves of TONSL mRNA expression levels for (A) lung cancer (AC,  $n=219$  ; SQCC,  $n=70$ ), (B) gastric cancer (intestinal,  $n=263$  ; diffused,  $n=231$ ), (C) breast cancer subtypes (luminal A,  $n=952$ ; luminal B,  $n=465$ ; HER2+,  $n=208$ ; basal,  $n=417$ ). Auto select best cut-off was used to split the cohorts of patients. All of the cohort showed a statistically significant difference except HER2+. (The log rank t test). (The data was accessed on 1 December 2021)

Supplementary Figure S2.

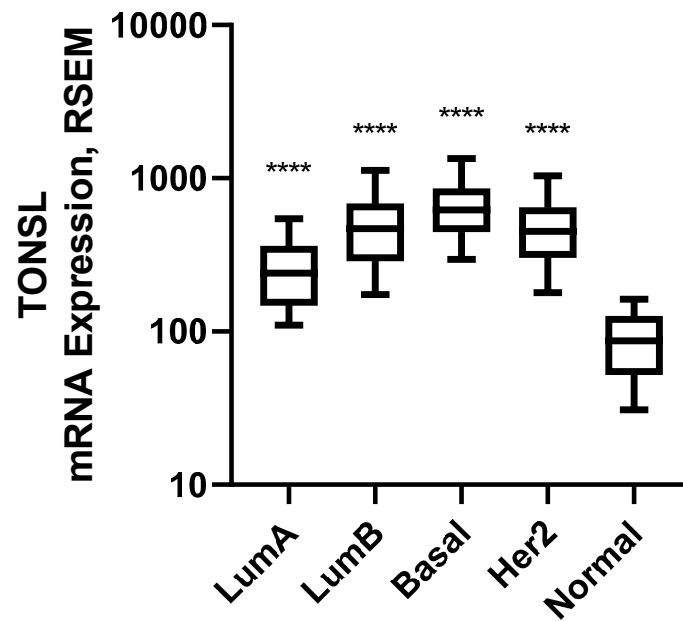

**Figure S2.** TONSL mRNA expression in various breast cancer subtypes and normal tissue. TONSL mRNA expression in breast cancer and normal breast tissues is shown as boxplots. The whiskers are 10-90 percentile range. RSEM (Batch normalized from Illumina HiSeq\_RNASeqV2) RNA seq data was derived from TCGA PanCancer Atlas study (The data was accessed on 16 December 2022). For statistical analysis, Dunnett's multiple comparisons test is used. LumA (n=499), LumB (n=197), Basal (n=171), Her2 (n=78), Normal (n=112). \*\*\*\*,  $P < 0.0001$ .

### Supplementary Figure S3.

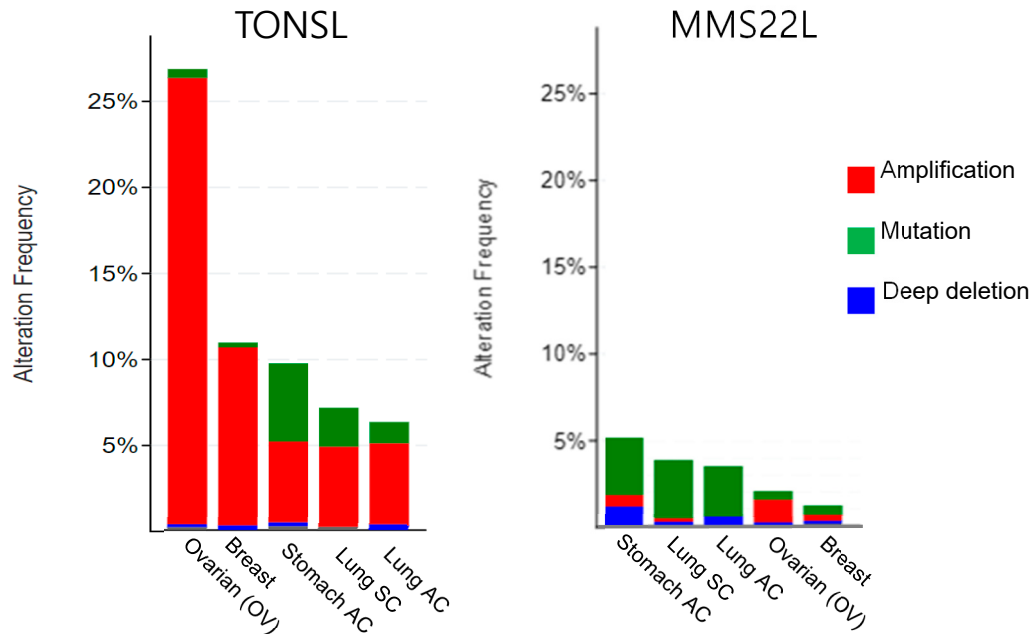

**Figure S3.** Gene amplification and gene amplification, deletion and mutation of *TONSL* and *MMS22L*. The mutation and alteration frequency were acquired from TCGA Pan-cancer Atlas Study using cBioportal. SC, Squamous Carcinoma; AC, Adenocarcinoma; OV, Ovarian Cancer. The frequency represents the percentage to the total tumors tested.

## Supplementary Figure S4

(A)

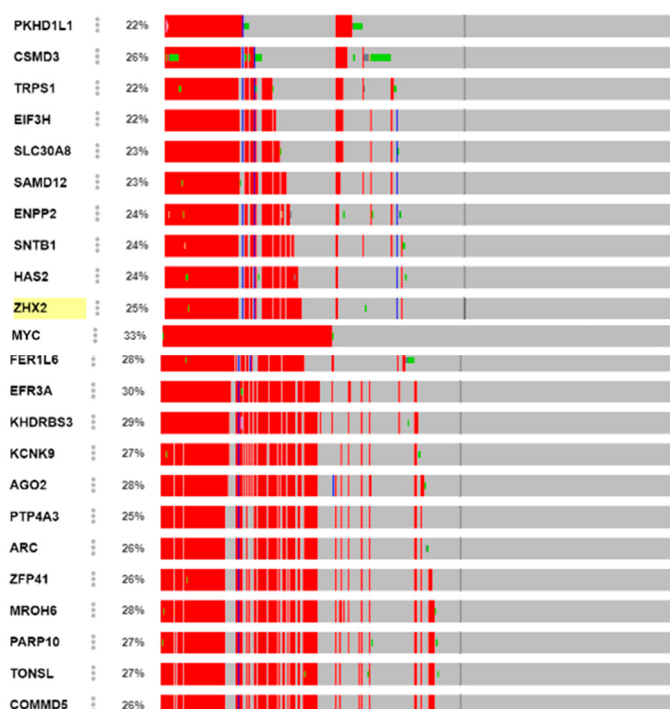

(B)

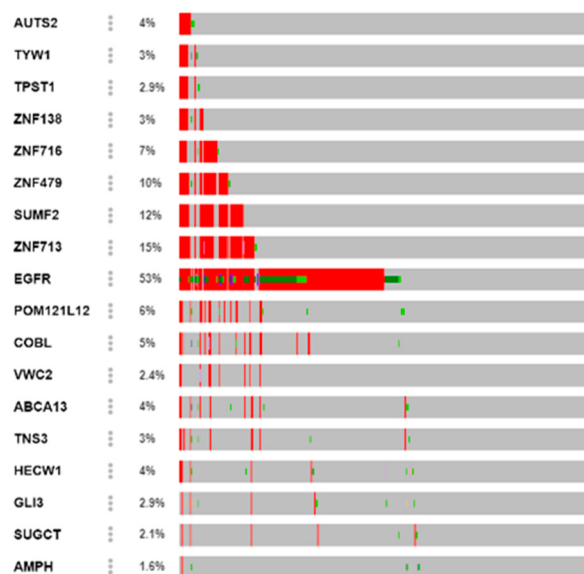

**Figure S4.** Gene coamplification pattern with neighboring potent driver oncogenes (A) genes close to the MYC in Ch8 in ovarian cancer. (B) Genes close to EGFR in Ch7 in glioblastoma. The data is from TCGA Pan-cancer Atlas Study and the analyzed data was captured from cBioportal.

## Supplementary Figure S5

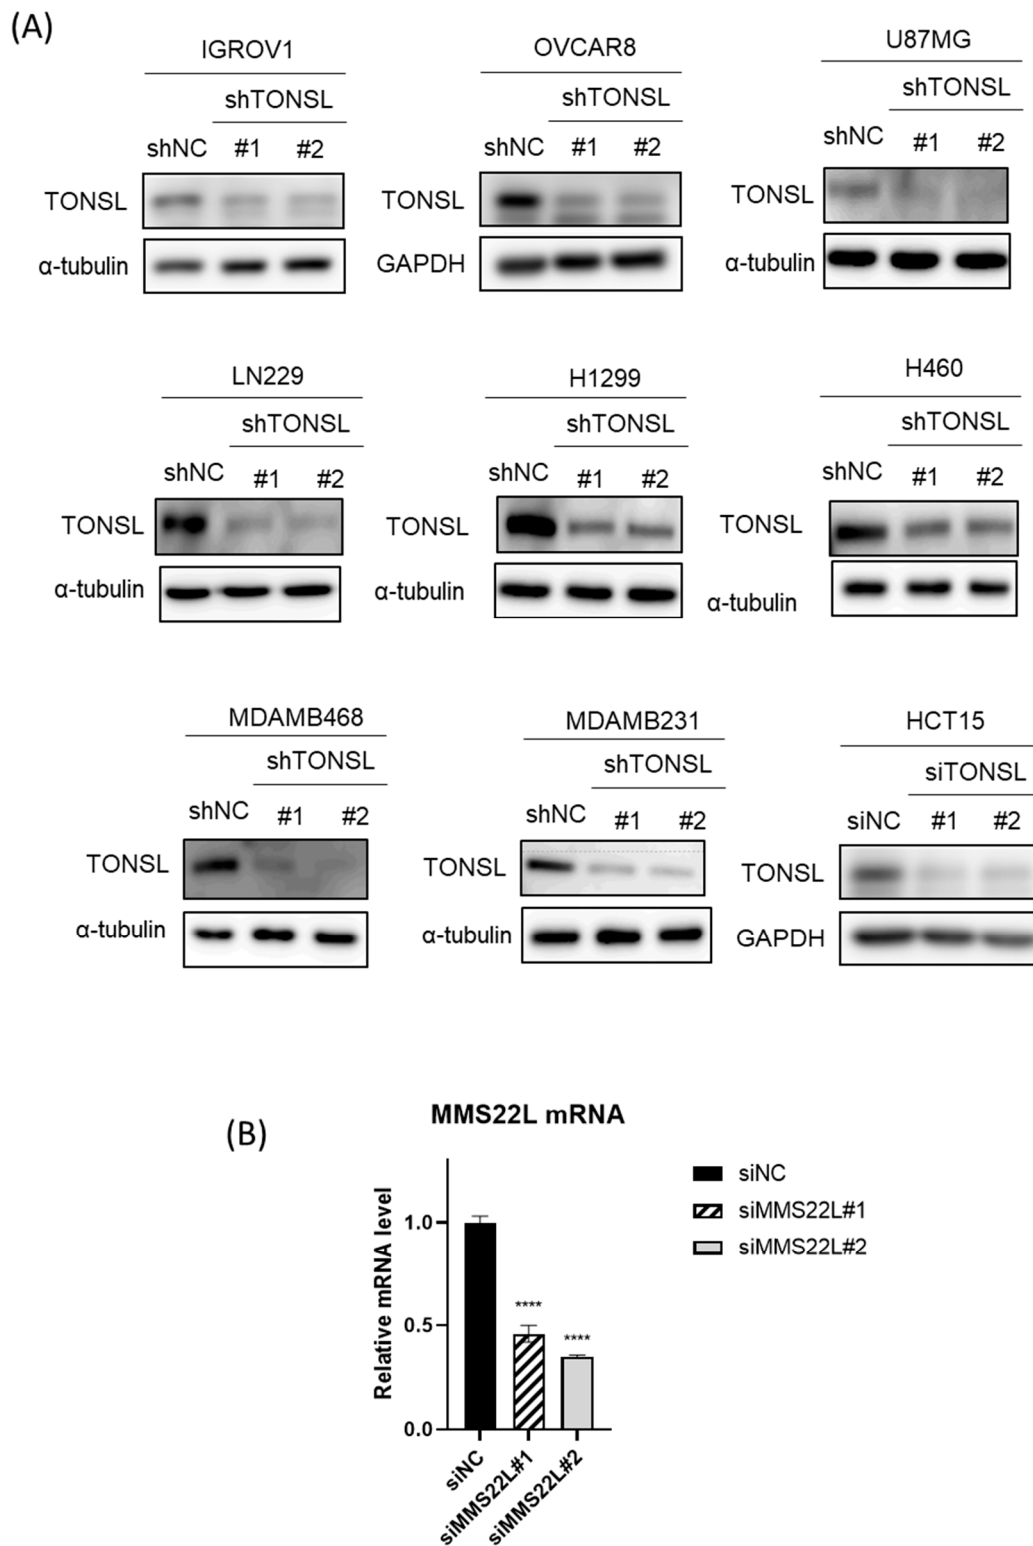

**Figure S5.** The effect of siRNA and shRNS used in the study (A) TONSL western blot (B) MMS22L real-time RT-PCR

## Supplementary Table S1

Table S1. The distance and co-amplification frequency with *MYC* at 8q24. The data is from TCGA Pan-cancer Atlas Study and the analyzed data was captured from cBioportal.

| <i>GENE</i>         | Distance from MYC (Kb) | Co-amplification with <i>MYC</i> (%) |
|---------------------|------------------------|--------------------------------------|
| <i>ANGPT1</i>       | -20479.5               | 54.41504                             |
| <i>EMC2</i>         | -19286.9               | 54.41504                             |
| <i>PKHD1L1</i>      | -18240                 | 61.0108                              |
| <i>CSMD3</i>        | -15515.9               | 65.95762                             |
| <i>TRPS1</i>        | -12330.6               | 70.90444                             |
| <i>EIF3H</i>        | -11240                 | 73.37785                             |
| <i>SLC30A8</i>      | -10602.2               | 75.0268                              |
| <i>SAMD12</i>       | -9360.47               | 77.50021                             |
| <i>ENPP2</i>        | -8200                  | 79.14915                             |
| <i>SNTB1</i>        | -7140                  | 80.79809                             |
| <i>HAS2</i>         | -6140                  | 84.09597                             |
| <i>ZHX2</i>         | -4978.24               | 82.44703                             |
| <i>FER1L6</i>       | -3777.01               | 84.92044                             |
| <i>MTSS1</i>        | -3168.15               | 88.21832                             |
| <b><i>MYC</i></b>   | <b>0</b>               | <b>100</b>                           |
| <i>EFR3A</i>        | 3192.55                | 93.98961                             |
| <i>KHDRBS3</i>      | 7819.329               | 89.04279                             |
| <i>KCNK9</i>        | 11022.13               | 86.56938                             |
| <i>AGO2</i>         | 12824.41               | 75.37519                             |
| <i>PTP4A3</i>       | 13672.79               | 79.97362                             |
| <i>ARC</i>          | 14870.85               | 78.32468                             |
| <i>PARP10</i>       | 16251.94               | 76.67574                             |
| <b><i>TONSL</i></b> | <b>16697.25</b>        | <b>75.85127</b>                      |
| <i>COMMD5</i>       | 17108.36               | 75.85127                             |

## Supplementary Table S2

Table S2. Sequences of quantitative RT-PCR primers and siRNAs

| Gene           | Forward primer (5'-3') | Reverse primer (5'-3') |
|----------------|------------------------|------------------------|
| MMS22L         | atgtgagcgggaatctctt    | gaaacacttggggttcgtc    |
| $\beta$ -Actin | attggcaatgagcgggttc    | ggatgccacaggactccat    |

  

| Target gene | siRNA      | Sense (5'>3')        | Antisense (5'>3')     |
|-------------|------------|----------------------|-----------------------|
| TONSL       | siTONSL#1  | caacuacgggcaucuaga   | gacaauuucuagaugccc    |
|             | siTONSL#2  | uuacuucaggaagagcau   | aaggaagaugcucuuccu    |
| MMS22L      | siMMS22L#1 | ucacaaaguccuuggaauuu | uauuccaaggacuuugugauu |
|             | siMMS22L#2 | gggagaaagcaaaggaauuu | auuccuuugcuucuccuu    |
